# Supplementary material
Source: Research Square preprint supplement (doi:10.21203/rs.3.rs-9561195/v1)
Supplement: Supplementary file 1 [file 9b02f1fde946500cb653ab11.docx]

**Neuroscientific Evaluation of Fear Appeal in Television Advertising: An Eye-Tracking and Biometric Study of Viewer Attention***

**Nihal Özkan, Birgül Taşdelen, Tuna Çakar and Aras Bozkurt**

**Corresponding Author:**

Birgül Taşdelen, Gümüşhane University, Communication Faculty, Department of Cinema and Television, 29100 Gümüşhane, TURKEY.

Phone: +90 456 2331000 #2411

E-mail: btasdelen@gumushane.edu.tr

ORCID ID: 0000-0003-0281-3892

Facebook: Birgül Güler Taşdelen

**Author Biographies**

**Nihal Özkan** completed her undergraduate education at Gümüşhane University, Faculty of Communication, Department of Public Relations and Publicity between 2013-2017. She completed her master’s degree at the same university’s Social Sciences Institute, Department of Public Relations and Publicity between 2017-2020. She is continuing her PhD studies at Atatürk University, Institute of Social Sciences, Department of Public Relations and Publicity. She conducts studies on advertising, personalization, political communication, semiotics, neuroscience, marketing and digitalization.

**Birgül Taşdelen** currently holds the position of Associate Proffessor in the Department of Radio, Television and Cinema at Gümüşhane University, Turkey, a role he has fulfilled since 2021. She completed her Ph.D. in Cinema and Television from Anadolu University in 2025, having previously earned an M.Sc. in Radio, Television and Cinema from Selçuk University in 2009, and a B.Sc. in Cinema and Television from Anadolu University in 2004. Dr. Taşdelen specializes in Interactive Television, Interactive Design, Social Media, New Media, Artificial Intelligence, Big Data and Helth Communication. She holds a national patent for content development in interactive television broadcasting. Previously, she has been involved in significant TÜBİTAK-funded projects related to health communication and Anadolu University and Gümüşhane University funded scientific research projects related to interactive television, health communication, mining documentary and cultural memory. As a prolific researcher, Dr. Taşdelen has authored several book chapters in edited volumes published by respected publishers like Springer and IGI Global. Dr. Taşdelen currently serves as the head of the cinema depertment, and is an active committee member involved in curriculum development and accreditation. Furthermore, she contributes to academia as an advisor, supervising Master's theses that leverage advanced methods in interactive television, everage advanced methods in neuroimaging, social media and cinema. Her recent advisory roles include master's level research on innovative AI applications about disasters.

**Tuna Çakar** currently holds the position of Assistant Professor in the Department of Computer Engineering at MEF University, Turkey, a role he has fulfilled since 2018. He completed his Ph.D. in Cognitive Science from Middle East Technical University in 2015, having previously earned an M.Sc. in Cognitive Science from Bosphorus University in 2009, and a B.Sc. in Biological Sciences & Bioengineering from Sabancı University in 2004. His academic experience spans several prestigious Turkish institutions. Before joining MEF University, Dr. Çakar served as a Lecturer at Acıbadem University (2015-2017) and Özyeğin University (2014-2015). Dr. Çakar specializes in Artificial Intelligence, Machine Learning, Deep Learning, Data Science, Reinforcement Learning, Big Data Analytics, Customer Analytical Segmentation, Churn Prediction, and Recommendation Systems leveraging DNN and LLM technologies. His interdisciplinary research integrates neuroimaging methods such as functional near-infrared spectroscopy (fNIRS), EEG, and eye-tracking, focusing on cognitive neuroscience topics including decision-making, reasoning, and problem-solving. He currently leads several innovative research projects funded by MEF University and TÜSEB, including the development of AI-supported portable exercise devices for children, and predictive modeling of math anxiety using neural and behavioral data. Previously, he has been involved in significant TÜBİTAK-funded projects related to financial risk assessment, pediatric health monitoring platforms, and brain-computer interfaces.

As a prolific researcher, Dr. Çakar has extensively published in high-ranking international journals such as Frontiers in Human Neuroscience, Digital Signal Processing, European Journal of Marketing, and Science and Engineering Ethics. His interdisciplinary studies frequently bridge neuroscience, machine learning, consumer behavior, and psychometric analyses. Additionally, he has presented extensively at major international conferences and authored several book chapters in edited volumes published by respected publishers like Springer and IGI Global. Dr. Çakar holds several administrative and academic leadership roles at MEF University. He currently manages the Lifelong Learning Application and Research Center, coordinates multiple graduate and undergraduate programs, serves as a principal investigator for the Artificial Intelligence Dynamics Laboratory and Brain Dynamics Laboratory, and is an active committee member involved in curriculum development and accreditation. Furthermore, Dr. Çakar contributes to academia as an advisor, supervising Ph.D. and Master's theses that leverage advanced methods in neuroimaging, machine learning, and consumer neuroscience. His recent advisory roles include doctoral and master's level research on cognitive processes, consumer behavior, and innovative AI applications in marketing and health sciences.

**Aras Bozkurt** is a researcher and faculty member at Anadolu University. Holding master's and doctoral degrees in distance education, Dr. Bozkurt's work focuses on empirical studies in areas such as distance education, online learning, networked learning, and educational technology. He applies critical theories such as connectionism, rhizomatic learning, and heutagogy in his research. Dr. Bozkurt is also interested in emerging research paradigms such as social network analysis, sentiment analysis, and data mining. His work also encompasses the integration of artificial intelligence technologies into educational processes within the context of human-machine interaction. Aras Bozkurt's commitment to advancing the field is reflected in his roles as editor-in-chief of Open Praxis and Asian Journal of Distance Education, as well as associate editors for prestigious journals such as Higher Education Research and Development, Online Learning, eLearn Magazine, and Computer Applications in Engineering Education.

* FUNDING DETAILS-AUTHOR NOTES: This work was produced from a Master’s thesis entitled "Measurement of Attentıon to Fear Attractıveness Used in Televısıon Advertısıng wıth Neuroscıentıfıc Methods".
